# Supplementary material for: Synergistic effects in the facilitated transfer of metal ions into room-temperature ionic liquids
Source: Royal Society of Chemistry journal article supplement (doi:10.1039/b414756a), 2005-01-01
Supplement: b414756a.pdf [file b414756a.pdf]

Electronic Supplementary Information for *Synergistic Effects in the Facilitated Transfer of Metal Ions into Room-Temperature Ionic Liquids*, Dominique Stepinski, Mark P. Jensen, Julie A. Dzielawa, and Mark L. Dietz.

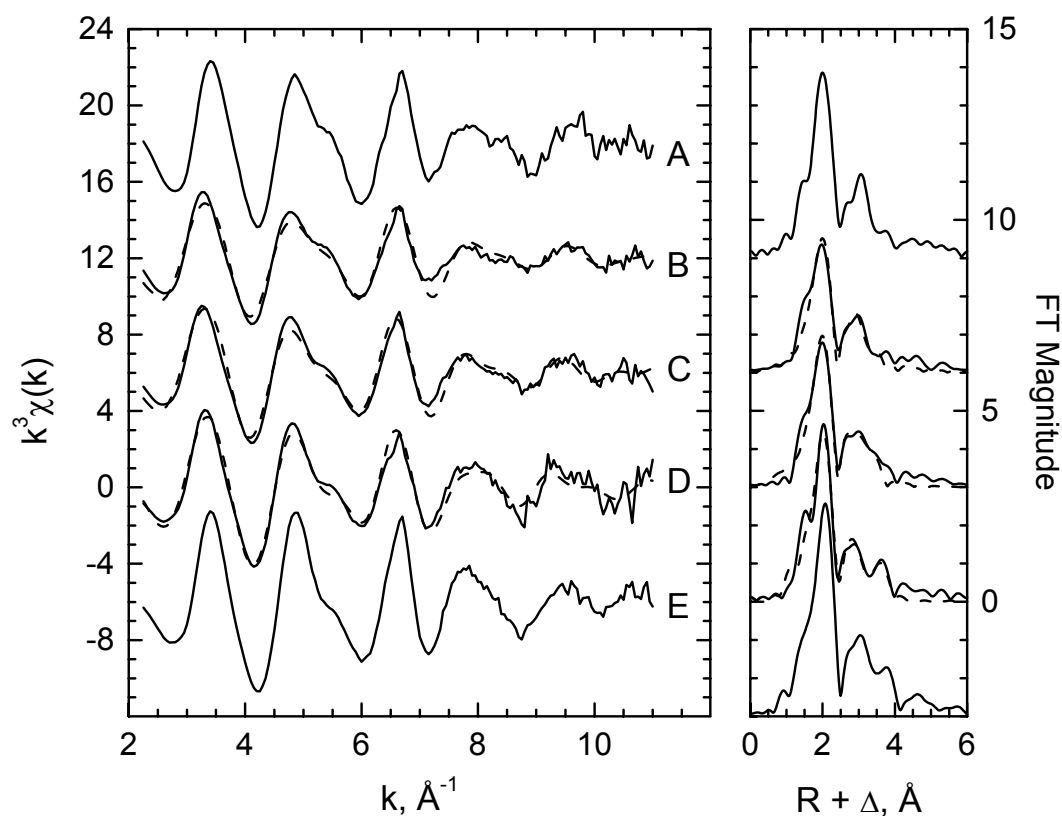

**Figure S1.**  $k^3$ -weighted Sr K-edge EXAFS of Sr-crown ether complexes in RTIL-TBP mixtures. (A) Sr(18-crown-6)(NO<sub>3</sub>)<sub>2</sub> dissolved in C<sub>5</sub>mim<sup>+</sup>Tf<sub>2</sub>N<sup>-</sup>, (B) Sr(DCH18C6)(NO<sub>3</sub>)<sub>2</sub> extracted in 100 % TBP, (C) Sr(DCH18C6)<sup>2+</sup> extracted into 10% C<sub>5</sub>mim<sup>+</sup>Tf<sub>2</sub>N<sup>-</sup>/90% TBP, (D) Sr(DCH18C6)<sup>2+</sup> extracted into 40% C<sub>5</sub>mim<sup>+</sup>Tf<sub>2</sub>N<sup>-</sup>/60% TBP, (E) Sr(DCH18C6)(H<sub>2</sub>O)<sub>2</sub><sup>2+</sup> extracted into 100% C<sub>5</sub>mim<sup>+</sup>Tf<sub>2</sub>N<sup>-</sup>.

**Table S1.** Scattering path lengths and energy threshold shifts for the most important scattering paths calculated by fitting FEFF8.00 theoretical phase and amplitude functions to the  $k^3$ -weighted Sr K-edge EXAFS. Calculated uncertainties in last digit of the fit parameters are given in parentheses. RTIL =  $C_5mim^+Tf_2N^-$

| Solvent           | Complex Species                                           | Average Scattering Path Length / Å |                   |          |                     |                                     | $\Delta E_0$ / eV |
|-------------------|-----------------------------------------------------------|------------------------------------|-------------------|----------|---------------------|-------------------------------------|-------------------|
|                   |                                                           | Sr-O                               | Sr-N              | Sr-C     | Sr-C-O <sup>b</sup> | Sr-O <sub>distal</sub> <sup>c</sup> |                   |
| RTIL <sup>a</sup> | Sr(NO <sub>3</sub> ) <sub>2</sub> (DCH18C6)               | 2.67                               | 3.07              | 3.54     | 3.84                | 4.31                                |                   |
| RTIL <sup>a</sup> | Sr(H <sub>2</sub> O) <sub>2</sub> (DCH18C6) <sup>2+</sup> | 2.65                               |                   | 3.55     | 3.84                |                                     |                   |
| 100% TBP          | Sr(DCH18C6) <sup>2+</sup>                                 | 2.62 (2)                           | 3.08 <sup>d</sup> | 3.51 (3) | 3.85 (5)            | 4.29 (5)                            | 6.2 (1.5)         |
| 10% RTIL/90% TBP  | Sr(DCH18C6) <sup>2+</sup>                                 | 2.61 (1)                           |                   | 3.53 (2) | 3.81 (2)            |                                     | 4.9 (1.1)         |
| 40% RTIL/60% TBP  | Sr(DCH18C6) <sup>2+</sup>                                 | 2.60 (1)                           |                   | 3.52 (2) | 3.81 (3)            |                                     | 5.0 (1.3)         |

<sup>a</sup>Reference 6

<sup>b</sup>Multiple scattering path

<sup>c</sup>Includes both single and multiple scattering paths

<sup>d</sup>Fixed parameter

**Table S2.** Debye-Waller Factors for the most important scattering paths calculated by fitting FEFF8.00 theoretical phase and amplitude functions to the  $k^3$ -weighted Sr K-edge EXAFS. Calculated uncertainties in last digit of the fit parameters are given in parentheses. RTIL =  $C_5mim^+Tf_2N^-$

| Solvent           | Complex Species                                           | Debye-Waller Factor / Å <sup>-2</sup> |      |                     |                     |                                     |
|-------------------|-----------------------------------------------------------|---------------------------------------|------|---------------------|---------------------|-------------------------------------|
|                   |                                                           | Sr-O                                  | Sr-N | Sr-C                | Sr-C-O <sup>b</sup> | Sr-O <sub>distal</sub> <sup>c</sup> |
| RTIL <sup>a</sup> | Sr(NO <sub>3</sub> ) <sub>2</sub> (DCH18C6)               | 0.0136 <sup>d</sup>                   | 0.04 | 0.009               | 0.002               | 0.008                               |
| RTIL <sup>a</sup> | Sr(H <sub>2</sub> O) <sub>2</sub> (DCH18C6) <sup>2+</sup> | 0.0136 <sup>d</sup>                   |      | 0.010               | 0.004               |                                     |
| 100% TBP          | Sr(DCH18C6) <sup>2+</sup>                                 | 0.0136 <sup>d</sup>                   |      | 0.0108 <sup>d</sup> | 0.003 (3)           | 0.010 (7)                           |
| 10% RTIL/90% TBP  | Sr(DCH18C6) <sup>2+</sup>                                 | 0.0136 <sup>d</sup>                   |      | 0.0108 <sup>d</sup> | 0.002 (2)           |                                     |
| 40% RTIL/60% TBP  | Sr(DCH18C6) <sup>2+</sup>                                 | 0.0136 <sup>d</sup>                   |      | 0.0108 <sup>d</sup> | 0.005 (3)           |                                     |

<sup>a</sup>Reference 6

<sup>b</sup>Multiple scattering path

<sup>c</sup>Includes both single and multiple scattering paths

<sup>d</sup>Fixed parameter
